# Supplementary material
Source: publisher figshare collection journal article supplement (https://wiley.figshare.com/articles/dataset/_/3560502)
Supplement: Supplementary file 2 [file 1 › appendix-F.htm]

Ecological Archives E095-244-A6


*Ecological Archives* E095-244-A6

Erica A. Newman, Mary Ellen Harte, Natalie Lowell, Mark Wilber, John Harte. 2014. Empirical tests of within- and across-species energetics in a diverse plant community. *Ecology* 95:2815–2825. http://dx.doi.org/10.1890/13-1955.1

Appendix F. The functional form of the average species energy distribution (ASED) (Nu) as derived from a discrete cumulative distribution function.

> View / download PDF.


---

[Back to E095-244]
